# Supplementary material for: A review of factors influencing vaccination policies and programs for older adults globally
Source: PubMed Central journal article supplement — Hum Vaccin Immunother. 2023 Jan 19;19(1):2157164. doi: 10.1080/21645515.2022.2157164 (PMC9980618; doi:10.1080/21645515.2022.2157164), 2023-01-19
Supplement: KHVI_A_2157164_SM8260.pdf [file KHVI_A_2157164_SM8260.pdf]

**Supplementary Table 1. PubMed Search Strategy – Initial Search Dated 01 February 2021**

| PubMed<br>Search date: 2021-02-01 |            |                                                                                                                                                                                                                                                   |
|-----------------------------------|------------|---------------------------------------------------------------------------------------------------------------------------------------------------------------------------------------------------------------------------------------------------|
| #                                 | Search     | Search terms                                                                                                                                                                                                                                      |
| 1                                 | Population | ("over 50 years old"[Title/Abstract]) OR ("older adult"[Title/Abstract] OR "elder*"[Title/Abstract] OR "geriatric"[Title/Abstract] OR "senior"[Title/Abstract] OR "life-course"[Title/Abstract])                                                  |
| 2                                 |            | "immuniz*"[Title/Abstract] OR "immunis*"[Title/Abstract] OR "vaccin*"[Title/Abstract]                                                                                                                                                             |
| 3                                 |            | #1 AND #2                                                                                                                                                                                                                                         |
| 4                                 | Outcome    | "activat*"[Title/Abstract] OR "access*"[Title/Abstract] OR "barrier*"[Title/Abstract] OR "driver*"[Title/Abstract] OR "facilitat*"[Title/Abstract] OR "influence"[Title/Abstract] OR "factor"[Title/Abstract] OR "impact"[Title/Abstract]         |
| 5                                 |            | "hesitan*"[Title/Abstract] OR "belief*"[Title/Abstract] OR "behavi*"[Title/Abstract] OR "confidence"[Title/Abstract] OR "social-norm"[Title/Abstract] OR "accept*"[Title/Abstract] OR "social determ*"[Title/Abstract]                            |
| 6                                 |            | "knowledge"[Title/Abstract] OR "internet access"[Title/Abstract] OR "information"[Title/Abstract]                                                                                                                                                 |
| 7                                 |            | "availability"[Title/Abstract] OR "site"[Title/Abstract] OR "center"[Title/Abstract] OR "centre"[Title/Abstract] OR "accessib*"[Title/Abstract] OR "supply"[Title/Abstract] OR "deliver*"[Title/Abstract]                                         |
| 8                                 |            | "advocacy"[Title/Abstract] OR "recommend*"[Title/Abstract]                                                                                                                                                                                        |
| 9                                 |            | "funding"[Title/Abstract] OR "cost"[Title/Abstract] OR "financial"[Title/Abstract] OR "infrastructure"[Title/Abstract] OR "policy"[Title/Abstract] OR "politic*"[Title/Abstract] OR "affordability"[Title/Abstract] OR "coverage"[Title/Abstract] |
| 10                                |            | #4 OR #5 OR #6 OR #7 OR #8 OR #9                                                                                                                                                                                                                  |
| 11                                |            | #3 AND #10                                                                                                                                                                                                                                        |
| 12                                |            |                                                                                                                                                                                                                                                   |
| 13                                |            | last 5 years                                                                                                                                                                                                                                      |

**Supplementary Table 2. Embase Search Strategy – Initial Search Dated 01 February 2021**

| <b>Embase</b>                  |            |                                                                                                                                                                  |
|--------------------------------|------------|------------------------------------------------------------------------------------------------------------------------------------------------------------------|
| <b>Search date: 2021-02-01</b> |            |                                                                                                                                                                  |
| #                              | Search     | Search terms                                                                                                                                                     |
| 1                              | Population | over 50 years old':ti,ab OR 'older adult':ti,ab OR 'elder*':ti,ab OR 'geriatric':ti,ab OR 'senior':ti,ab OR 'life-course':ti,ab                                  |
| 2                              |            | 'immuniz*':ti,ab OR 'immunis*':ti,ab OR 'vaccin*':ti,ab                                                                                                          |
| 3                              |            | #1 AND #2                                                                                                                                                        |
| 4                              | Outcome    | activat*':ti,ab OR 'access*':ti,ab OR 'barrier*':ti,ab OR 'driver*':ti,ab OR 'facilitat*':ti,ab OR 'influence':ti,ab OR 'factor':ti,ab OR 'impact':ti,ab         |
| 5                              |            | hesitan*':ti,ab OR 'belief*':ti,ab OR 'behavi*':ti,ab OR 'confidence':ti,ab OR 'social-norm':ti,ab OR 'accept*':ti,ab OR 'social determ*':ti,ab                  |
| 6                              |            | knowledge':ti,ab OR 'internet access':ti,ab OR 'information':ti,ab                                                                                               |
| 7                              |            | availability':ti,ab OR 'site':ti,ab OR 'center':ti,ab OR 'centre':ti,ab OR 'accessib*':ti,ab OR 'supply':ti,ab OR 'deliver*':ti,ab                               |
| 8                              |            | advocacy':ti,ab OR 'recommend*':ti,ab                                                                                                                            |
| 9                              |            | funding':ti,ab OR 'cost':ti,ab OR 'financial':ti,ab OR 'infrastructure':ti,ab OR 'policy':ti,ab OR 'politic*':ti,ab OR 'affordability':ti,ab OR 'coverage':ti,ab |
| 10                             |            | #4 OR #5 OR #6 OR #7 OR #8 OR #9                                                                                                                                 |
| 11                             |            | #3 AND #10                                                                                                                                                       |
| 12                             |            | english language filter                                                                                                                                          |
| 13                             |            | last 5 years                                                                                                                                                     |

**Supplementary Table 3. PubMed Search Strategy – Subsequent Search Dated 22 December 2021**

| PubMed                  |            |                                                                                                                                                                                                                                                                                                                                                                                                                                                                                                                                                                                                                                                                                                                                    |
|-------------------------|------------|------------------------------------------------------------------------------------------------------------------------------------------------------------------------------------------------------------------------------------------------------------------------------------------------------------------------------------------------------------------------------------------------------------------------------------------------------------------------------------------------------------------------------------------------------------------------------------------------------------------------------------------------------------------------------------------------------------------------------------|
| Search date: 2021-12-22 |            |                                                                                                                                                                                                                                                                                                                                                                                                                                                                                                                                                                                                                                                                                                                                    |
| #                       | Search     |                                                                                                                                                                                                                                                                                                                                                                                                                                                                                                                                                                                                                                                                                                                                    |
| 1                       | Population | "over 50 years old"[Title/Abstract] OR "older adult"[Title/Abstract] OR "elder*"[Title/Abstract] OR "geriatric*"[Title/Abstract] OR "aged"[Title/Abstract] OR "senior"[Title/Abstract]                                                                                                                                                                                                                                                                                                                                                                                                                                                                                                                                             |
| 2                       |            | "immuniz*"[Title/Abstract] OR "immunis*"[Title/Abstract] OR "vaccin*"[Title/Abstract]                                                                                                                                                                                                                                                                                                                                                                                                                                                                                                                                                                                                                                              |
| 3                       |            | #1 AND #2                                                                                                                                                                                                                                                                                                                                                                                                                                                                                                                                                                                                                                                                                                                          |
| 4                       | Outcome    | "routine vaccine"[Title/Abstract] OR "routine vaccin*"[Title/Abstract] OR "routine vaccination"[Title/Abstract] OR "routine immunization"[Title/Abstract]                                                                                                                                                                                                                                                                                                                                                                                                                                                                                                                                                                          |
| 5                       |            | "influenza vaccin*"[Title/Abstract] OR "influenza immunization*"[Title/Abstract] OR "flu vaccin*"[Title/Abstract] OR "flu immunization*"[Title/Abstract] OR "shingles vaccin*"[Title/Abstract] OR (("herpes zoster"[MeSH Terms] OR ("herpes"[All Fields] AND "zoster"[All Fields]) OR "herpes zoster"[All Fields] OR "shingles"[All Fields] OR "shingle"[All Fields]) AND "immunization*"[Title/Abstract]) OR "zoster vaccin*"[Title/Abstract] OR "zoster immunization*"[Title/Abstract] OR "pneumococcal vaccin*"[Title/Abstract] OR "pneumococcal immunization*"[Title/Abstract] OR "tdap vaccin*"[Title/Abstract] OR "tdap immunization*"[Title/Abstract] OR "td vaccin*"[Title/Abstract] OR "td immunization*"[Title/Abstract] |
| 6                       |            | "vaccinator*"[Title/Abstract] OR "vaccine provider*"[Title/Abstract] OR "provider*"[Title/Abstract] OR "pharmac*"[Title/Abstract] OR "nurs*"[Title/Abstract] OR "community health worker*"[Title/Abstract] OR "community vaccinator*"[Title/Abstract]                                                                                                                                                                                                                                                                                                                                                                                                                                                                              |
| 7                       |            | "location*"[Title/Abstract] OR "pharmacy*"[Title/Abstract] OR "retail clinic*"[Title/Abstract] OR "workplace*"[Title/Abstract] OR "alternative site*"[Title/Abstract] OR "alternative location*"[Title/Abstract] OR "choice*"[Title/Abstract] OR "vaccination site*"[Title/Abstract]                                                                                                                                                                                                                                                                                                                                                                                                                                               |
| 8                       |            | "funding*"[Title/Abstract] OR "cost"[Title/Abstract] OR "financi*"[Title/Abstract] OR "affordability"[Title/Abstract] OR "copay*"[Title/Abstract] OR "cost shar*"[Title/Abstract] OR "out of pocket*"[Title/Abstract] OR "incentiv*"[Title/Abstract] OR "free vaccination polic*"[Title/Abstract] OR "free vaccination program*"[Title/Abstract] OR "payment"[Title/Abstract] OR "compensat*"[Title/Abstract] OR "mandate*"[Title/Abstract]                                                                                                                                                                                                                                                                                        |
| 9                       |            | "access*"[Title/Abstract] OR "coverage*"[Title/Abstract] OR "uptake*"[Title/Abstract] OR "provider recommendation*"[Title/Abstract] OR "demand*"[Title/Abstract] OR "utilization*"[Title/Abstract]                                                                                                                                                                                                                                                                                                                                                                                                                                                                                                                                 |
| 10                      |            | #4 OR #5 OR #6 OR #7 OR #8 OR #9                                                                                                                                                                                                                                                                                                                                                                                                                                                                                                                                                                                                                                                                                                   |
| 11                      |            | #3 AND #10                                                                                                                                                                                                                                                                                                                                                                                                                                                                                                                                                                                                                                                                                                                         |
| 12                      |            | English Language Filter                                                                                                                                                                                                                                                                                                                                                                                                                                                                                                                                                                                                                                                                                                            |
| 13                      |            | Last 10 Years filter                                                                                                                                                                                                                                                                                                                                                                                                                                                                                                                                                                                                                                                                                                               |
| 14                      |            | Last 5 Years filter (2016-2021)                                                                                                                                                                                                                                                                                                                                                                                                                                                                                                                                                                                                                                                                                                    |
| 15                      |            | Human-specific studies filter                                                                                                                                                                                                                                                                                                                                                                                                                                                                                                                                                                                                                                                                                                      |

|    |  |                                                |
|----|--|------------------------------------------------|
| 16 |  | AND NOT Covid                                  |
| 17 |  | #14 AND #15 AND #16 AND "Free Full Text"       |
| 18 |  | #17 plus PubMed filters:                       |
|    |  | Adult: 19+ years                               |
|    |  | Middle Aged + Aged: 45+ years                  |
|    |  | Middle Aged: 45-64 years                       |
|    |  | Aged: 65+ years                                |
|    |  | 80 and over: 80+ years                         |
| 19 |  | #18 AND NOT "Surveillance" OR "Immunogenicity" |
| 20 |  | #19 AND NOT "Systematic Review"                |

**Supplementary Table 4. Google Scholar Search Strategy – Initial Search Dated 22 December 2021**

| Google Scholar          |            |                                                                                                                                                                                                                                                                                                                                                                                                                                                                                                                                                                                                                                                                                                                                    |
|-------------------------|------------|------------------------------------------------------------------------------------------------------------------------------------------------------------------------------------------------------------------------------------------------------------------------------------------------------------------------------------------------------------------------------------------------------------------------------------------------------------------------------------------------------------------------------------------------------------------------------------------------------------------------------------------------------------------------------------------------------------------------------------|
| Search date: 2021-12-22 |            |                                                                                                                                                                                                                                                                                                                                                                                                                                                                                                                                                                                                                                                                                                                                    |
| #                       | Search     |                                                                                                                                                                                                                                                                                                                                                                                                                                                                                                                                                                                                                                                                                                                                    |
| 1                       | Population | "over 50 years old"[Title/Abstract] OR "older adult"[Title/Abstract] OR "elder*"[Title/Abstract] OR "geriatric*"[Title/Abstract] OR "aged"[Title/Abstract] OR "senior"[Title/Abstract]                                                                                                                                                                                                                                                                                                                                                                                                                                                                                                                                             |
| 2                       |            | "immuniz*"[Title/Abstract] OR "immunis*"[Title/Abstract] OR "vaccin*"[Title/Abstract]                                                                                                                                                                                                                                                                                                                                                                                                                                                                                                                                                                                                                                              |
| 3                       | Outcome    | "routine vaccine"[Title/Abstract] OR "routine vaccin*"[Title/Abstract] OR "routine vaccination"[Title/Abstract] OR "routine immunization"[Title/Abstract]                                                                                                                                                                                                                                                                                                                                                                                                                                                                                                                                                                          |
| 4                       |            | "influenza vaccin*"[Title/Abstract] OR "influenza immunization*"[Title/Abstract] OR "flu vaccin*"[Title/Abstract] OR "flu immunization*"[Title/Abstract] OR "shingles vaccin*"[Title/Abstract] OR (("herpes zoster"[MeSH Terms] OR ("herpes"[All Fields] AND "zoster"[All Fields]) OR "herpes zoster"[All Fields] OR "shingles"[All Fields] OR "shingle"[All Fields]) AND "immunization*"[Title/Abstract]) OR "zoster vaccin*"[Title/Abstract] OR "zoster immunization*"[Title/Abstract] OR "pneumococcal vaccin*"[Title/Abstract] OR "pneumococcal immunization*"[Title/Abstract] OR "tdap vaccin*"[Title/Abstract] OR "tdap immunization*"[Title/Abstract] OR "td vaccin*"[Title/Abstract] OR "td immunization*"[Title/Abstract] |
| 5                       |            | "vaccinator*"[Title/Abstract] OR "vaccine provider*"[Title/Abstract] OR "provider*"[Title/Abstract] OR "pharmac*"[Title/Abstract] OR "nurs*"[Title/Abstract] OR "community health worker*"[Title/Abstract] OR "community vaccinator*"[Title/Abstract]                                                                                                                                                                                                                                                                                                                                                                                                                                                                              |
| 6                       |            | "location*"[Title/Abstract] OR "pharmacy*"[Title/Abstract] OR "retail clinic*"[Title/Abstract] OR "workplace*"[Title/Abstract] OR "alternative site*"[Title/Abstract] OR "alternative location*"[Title/Abstract] OR "choice*"[Title/Abstract] OR "vaccination site*"[Title/Abstract]                                                                                                                                                                                                                                                                                                                                                                                                                                               |
| 7                       |            | "funding*"[Title/Abstract] OR "cost"[Title/Abstract] OR "financi*"[Title/Abstract] OR "affordability"[Title/Abstract] OR "copay*"[Title/Abstract] OR "cost shar*"[Title/Abstract] OR "out of pocket*"[Title/Abstract] OR "incentiv*"[Title/Abstract] OR "free vaccination polic*"[Title/Abstract] OR "free vaccination program*"[Title/Abstract] OR "payment"[Title/Abstract] OR "compensat*"[Title/Abstract] OR "mandate*"[Title/Abstract]                                                                                                                                                                                                                                                                                        |
| 8                       |            | "access*"[Title/Abstract] OR "coverage*"[Title/Abstract] OR "uptake*"[Title/Abstract] OR "provider recommendation*"[Title/Abstract] OR "demand*"[Title/Abstract] OR "utilization*"[Title/Abstract]                                                                                                                                                                                                                                                                                                                                                                                                                                                                                                                                 |
| 9                       |            | Publication Date filter (2016- 2021)                                                                                                                                                                                                                                                                                                                                                                                                                                                                                                                                                                                                                                                                                               |

### Supplementary Table 5. Categories of the factors affecting older adult vaccination

| Factor                               | Description (examples)                                                                                            |
|--------------------------------------|-------------------------------------------------------------------------------------------------------------------|
| <b>Affordability</b>                 |                                                                                                                   |
| <b>Government funded</b>             | Individuals do not contribute to the cost items related to vaccination (e.g., acquisition, administration, visit) |
| <b>Co-payment</b>                    | Individuals pay a portion of the medical expenses related to vaccination                                          |
| <b>Monetary incentive</b>            | Individuals receive financial incentive to encourage vaccination                                                  |
| <b>Awareness</b>                     |                                                                                                                   |
| <b>Reminder</b>                      | Electronic system or text reminders to patients or providers                                                      |
| <b>Media coverage</b>                | Quantifying impact of media coverage in prints, television and online sources                                     |
| <b>Education</b>                     | Education programs given to patients or HCPs; HCPs educating patients during consultation                         |
| <b>Access</b>                        |                                                                                                                   |
| <b>Expanding vaccination setting</b> | Expanding vaccination settings (vaccination during hospitalizations, diversification of sites and/or clinics)     |
| <b>Expanding vaccinators</b>         | Expanding vaccination to pharmacists                                                                              |

### Supplementary Table 6. Study Characteristics

| Study             | Study design (year of data)          | Location <sup>A</sup> | Vaccine <sup>B</sup> | Population                                 |
|-------------------|--------------------------------------|-----------------------|----------------------|--------------------------------------------|
| Abu-Rish 2020 [1] | Experimental (2019-2020)             | Jordan (L)            | P                    | Individuals ≥65 (n= 700)                   |
| Berkhout 2018 [2] | Randomized Control Trial (2014-2015) | France (L)            | I                    | Individuals ≥65 chronic disease (n=10,597) |
| Biyik 2020 [1]    | Experimental (2017)                  | Turkey (L)            | P                    | Individuals ≥65 (n=200)                    |

|                           |                                                          |                        |      |                                               |
|---------------------------|----------------------------------------------------------|------------------------|------|-----------------------------------------------|
| <b>Blanchi 2020 [1]</b>   | Experimental,<br>Cluster-randomized study<br>(2018-2019) | South Korea (L)        | T    | Individuals ≥<br>(n=150)                      |
| <b>Blank 2018 [1]</b>     | Observational<br>(2014-2015)                             | Europe (21 countries)  | I    | Individuals ≥<br>(NR)                         |
| <b>Brilli 2020 [1]</b>    | Observational<br>(2012-2013)                             | Italy (N)              | I    | Individuals ≥<br>(n = 160,000)                |
| <b>Buchan 2017 [2]</b>    | Observational<br>(2007-2014)                             | Canada (N)             | I    | Individuals ≥<br>(NR)                         |
| <b>Burka 2019 [1]</b>     | Experimental<br>(2015-2016)                              | USA (L)                | P    | Veterans ≥<br>(n=540)                         |
| <b>Chen 2020 [1]</b>      | Observational<br>(2010-2017)                             | USA (N)                | I    | Individuals ≥<br>(n=814,980)                  |
| <b>Erlandson 2018 [1]</b> | Experimental<br>(2014-2016)                              | USA (L) and Canada (L) | Z    | People living with<br>(n=269)                 |
| <b>Healy 2019 [1]</b>     | Experimental<br>(2018)                                   | USA (L)                | I, P | Patients ≥<br>(n=808)                         |
| <b>Hechter 2017 [1]</b>   | Observational<br>(2011-2012)                             | USA (L)                | Z    | Medicare Pa<br>beneficiaries<br>(n = 160,000) |
| <b>Herrett 2016 [2]</b>   | Experimental<br>(2013-2014)                              | UK (N)                 | I    | At-risk individuals<br>64<br>(NR)             |
| <b>Higuchi 2018 [2]</b>   | Observational<br>(2013)                                  | Japan(L)               | P    | Individuals ≥<br>(n=209)                      |
| <b>Isenor 2016 [1]</b>    | Observational<br>(2012-2015)                             | Canada (L)             | I    | Individuals ≥<br>(n= NR)                      |
| <b>Itamochi 2016 [1]</b>  | Observational<br>(2007-2018)                             | Japan (L)              | I    | Individuals ≥<br>(NR)                         |
| <b>Jiang 2021 [1]</b>     | Observational<br>(2019)                                  | China (L)              | I    | Individuals ≥<br>(n = 1,120)                  |
| <b>Ko 2020 [1]</b>        | Observational<br>(2014-2017)                             | South Korea (N)        | I    | Individuals ≥<br>(n=7,559)                    |
| <b>Leung 2017 [1]</b>     | Experimental<br>(2015)                                   | Hong Kong (L)          | I    | Community-dw<br>individuals ≥<br>(n=529)      |
| <b>Litt 2020 [2]</b>      | Observational<br>(2016-2018)                             | Australia (N)          | Z    | Individuals 70<br>(NR)                        |

|                             |                              |                 |            |                                                                                          |
|-----------------------------|------------------------------|-----------------|------------|------------------------------------------------------------------------------------------|
|                             |                              |                 |            |                                                                                          |
| <b>Lv 2016 [2]</b>          | Observational<br>(2013)      | China (L)       | I          | Individuals ≥65<br>(n=1,673)                                                             |
| <b>McAdam-Marx 2019 [2]</b> | Observational<br>(2013-2017) | USA (L)         | P          | At-risk adults aged 65-74<br>(n=18,851)<br>Adults ≥65 [n=18,851]                         |
| <b>McGreevy 2020 [2]</b>    | Experimental<br>(2019)       | USA (L)         | P          | Individuals ≥65<br>(n=695)                                                               |
| <b>Naito 2020 [2]</b>       | Observational<br>(2009-2018) | Japan (N)       | P          | Individuals ≥65<br>(NR)                                                                  |
| <b>Nowalk 2017 [2]</b>      | Experimental<br>(2013-2015)  | USA (L)         | I, P, T    | High-Risk Individuals<br>(n=4,737)                                                       |
| <b>Pizzi 2018 [1]</b>       | Observation<br>(2014)        | USA (L)         | P          | Individuals ≥65<br>(n=276)                                                               |
| <b>Restivo 2019 [2]</b>     | Observational<br>(2016)      | Italy (L)       | I          | Individuals ≥65<br>(NR)                                                                  |
| <b>Rosseli 2017 [1]</b>     | Observational<br>(2014-2015) | Italy (L)       | I          | Individuals ≥65<br>(NR)                                                                  |
| <b>Schattner 2020 [1]</b>   | Experimental<br>(2018)       | Israel (L)      | I          | Community-dwelling<br>patients ≥65<br>(n=100)                                            |
| <b>Sheer 2021 [2]</b>       | Experimental<br>(2017)       | USA (L)         | I, P       | Medicare Pa-<br>Beneficiaries<br>(n=2,135)<br>Medicare Pa-<br>Beneficiaries<br>(n=2,798) |
| <b>Szilagyi 2020 [2]</b>    | Experimental<br>(2018-2019)  | USA (L)         | I          | Primary care pa-<br>(n=164,200)                                                          |
| <b>Tao 2019 [2]</b>         | Experimental<br>(2016-2017)  | China (L)       | I          | Individuals ≥35<br>diabetes<br>(n=1,538)                                                 |
| <b>Wright 2019 [1]</b>      | Experimental<br>(2017-2019)  | USA (L)         | I, P, T, Z | Primary care pat-<br>Nurse Practitione<br>clinic ≥65<br>(n=808)                          |
| <b>Yan 2018 [1]</b>         | Observational<br>(2012-2014) | USA (N)         | T, Z       | Medicare Pa-<br>beneficiaries<br>(n=427,444 / n=808)<br>n=346,417                        |
| <b>Yang 2016 [1]</b>        | Observational<br>(2013-2014) | South Korea (N) | P          | Individuals ≥65<br>(NR)                                                                  |



|                           |                                                            |               |         |                                  |
|---------------------------|------------------------------------------------------------|---------------|---------|----------------------------------|
|                           |                                                            |               |         |                                  |
| <b>Yi 2018 [2]</b>        | Experimental<br>(2014-2015)                                | China (L)     | I       | Individuals ≥<br>(n=12,513)      |
| <b>Yokum 2018 [1]</b>     | Experimental,<br>Pragmatic Randomized Trial<br>(2014-2015) | USA (N)       | I       | Medicare benefici<br>(n=228,000) |
| <b>Yue 2020 [1]</b>       | Randomized Control Trial<br>(2018)                         | Singapore (L) | I       | Individuals ≥<br>(n=4,000)       |
| <b>Yürüyen 2018 [1]</b>   | Experimental<br>(2013-2015)                                | Turkey (L)    | I, P, T | Individuals ≥<br>(n=267)         |
| <b>Zimmerman 2017 [2]</b> | Experimental<br>(2012-2015)                                | USA (L)       | P       | Individuals ≥<br>(n=18,107)      |

Studies designated with [1] and [2] were respectively identified during the initial and supplemental searches

<sup>A</sup> L = local/regional, N = national, UK = United Kingdom, USA = United States of America

<sup>B</sup> I = influenza, P = pneumococcal, T = tetanus-containing, Z = herpes zoster

<sup>C</sup> Some N values were not reported. (n = NR)

Numbers indicate age in years. Some populations included individuals not within the target population age - studies were included with results reported when stratified by age of interest

GP= general practitioner; HCP= healthcare provider, NIP = national immunization program
